# Supplementary material
Source: Springer Nature journal article supplement (https://www.springermedizin.de/resource/supplementary/12943_2010_729_MOESM1_ESM.pdf/9554674)

A.

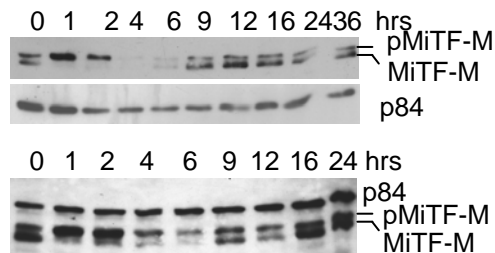

B.

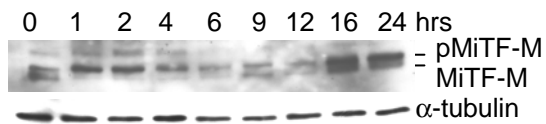

D.

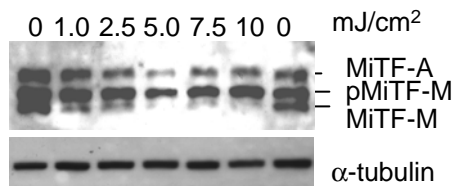

C.

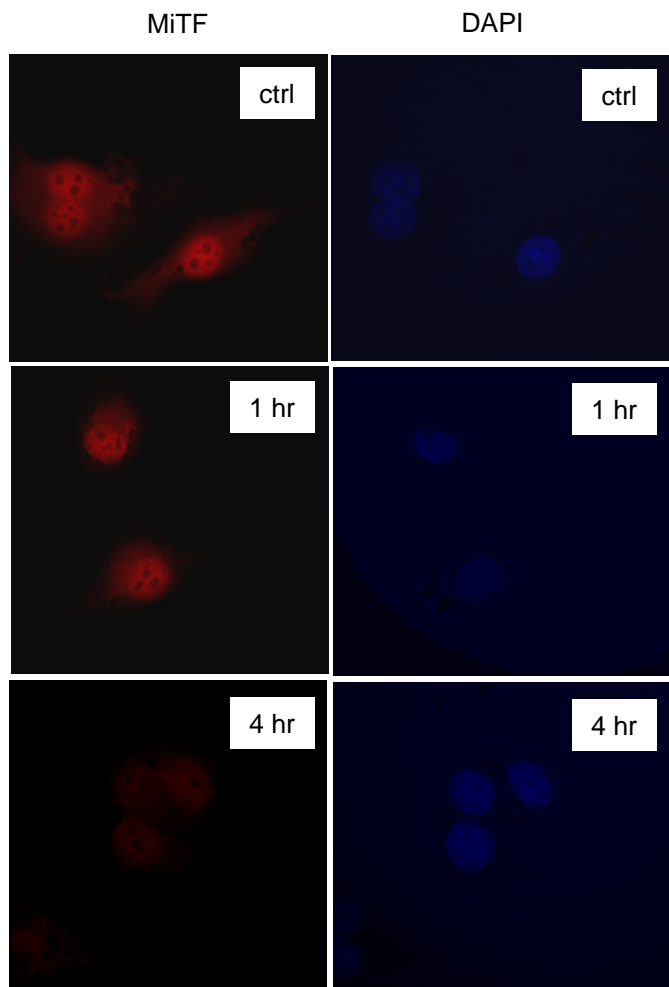

Supplement: MOESM1 [file 9554674]
